# Supplementary material
Source: HighWire-hosted journal article supplement (https://bmjopen.bmj.com/content/14/3/e075381)
Supplement: inline-supplementary-material-1 [file inline-supplementary-material-1.pdf]

**Supplemental Table 1. Schedule of Visits and Procedures for PC952 (Zimbabwe) and PC953 (South Africa)**

| PROCEDURES                                                              | VISIT Day/Week      |       |      |      |       |       |       |                 |                 |                 |                  |                  |                  |                                     |
|-------------------------------------------------------------------------|---------------------|-------|------|------|-------|-------|-------|-----------------|-----------------|-----------------|------------------|------------------|------------------|-------------------------------------|
|                                                                         | V0                  | V1    | V2   | V3   | V4    | V5    | V6    | V7 <sup>3</sup> | V8 <sup>2</sup> | V9 <sup>2</sup> | V10 <sup>2</sup> | V11 <sup>2</sup> | V12 <sup>2</sup> | V13 <sup>1</sup> /Early Termination |
|                                                                         | Day ≤-45            | Day 1 | Wk 4 | Wk 8 | Wk 12 | Wk 16 | Wk 20 | Wk 24           | Wk 28           | Wk 32           | Wk 36            | Wk 40            | Wk 44            | Wk 48                               |
| Visit Type                                                              | SCR                 | ENR   | FU   | FU   | CO    | FU    | FU    | CH              | FU              | FU              | FU               | FU               | FU               | CLO                                 |
| <b>ADMINISTRATIVE</b>                                                   |                     |       |      |      |       |       |       |                 |                 |                 |                  |                  |                  |                                     |
| Informed consent                                                        | X                   |       |      |      |       |       |       |                 |                 |                 |                  |                  |                  |                                     |
| Assign participant ID number                                            | X                   |       |      |      |       |       |       |                 |                 |                 |                  |                  |                  |                                     |
| Assess eligibility                                                      | X                   | X     |      |      |       |       |       |                 |                 |                 |                  |                  |                  |                                     |
| Demographics                                                            | X                   |       |      |      |       |       |       |                 |                 |                 |                  |                  |                  |                                     |
| Randomization                                                           |                     | X     |      |      |       |       |       |                 |                 |                 |                  |                  |                  |                                     |
| <b>COUNSELING</b>                                                       |                     |       |      |      |       |       |       |                 |                 |                 |                  |                  |                  |                                     |
| HIV pre and post-test counseling and testing, risk reduction counseling | X                   | X     | X    | X    | X     | X     | X     | X               | X <sup>2</sup>  | X <sup>2</sup>  | X <sup>2</sup>   | X <sup>2</sup>   | X <sup>2</sup>   | X <sup>2</sup>                      |
| STI/HIV risk reduction counseling                                       | X                   | X     | X    | X    | X     | X     | X     | X               | X <sup>2</sup>  | X <sup>2</sup>  | X <sup>2</sup>   | X <sup>2</sup>   | X <sup>2</sup>   | X <sup>2</sup>                      |
| Contraceptive counseling                                                | X                   | X     | X    | X    | X     | X     | X     | X               | X <sup>2</sup>  | X <sup>2</sup>  | X <sup>2</sup>   | X <sup>2</sup>   | X <sup>2</sup>   | X <sup>2</sup>                      |
| Protocol adherence counseling                                           |                     | X     | X    | X    | X     | X     | X     | X               | X <sup>2</sup>  | X <sup>2</sup>  | X <sup>2</sup>   | X <sup>2</sup>   | X <sup>2</sup>   |                                     |
| <b>CLINICAL</b>                                                         |                     |       |      |      |       |       |       |                 |                 |                 |                  |                  |                  |                                     |
| Administer HIV risk assessments (clinician-based and self-assessment)   | X                   |       |      |      |       |       |       |                 |                 |                 |                  |                  |                  |                                     |
| Medical history                                                         | X                   |       |      |      |       |       |       |                 |                 |                 |                  |                  |                  |                                     |
| Record medication history/ concomitant medications                      | X                   | *     | *    | *    | *     | *     | *     | *               | *               | *               | *                | *                | *                | *                                   |
| Vital signs                                                             | X♦§                 | X     | X♦   | X    | X     | X♦    | X     | X               | X♦ <sup>2</sup> | X <sup>2</sup>  | X <sup>2</sup>   | X <sup>2</sup>   | X <sup>2</sup>   | X♦ <sup>2</sup>                     |
| Complete physical exam                                                  | X                   | *     | *    | *    | *     | *     | *     | X <sup>1</sup>  | *               | *               | *                | *                | *                | X                                   |
| Targeted physical exam                                                  |                     | X     | *    | *    | *     | *     | *     | *               | *               | *               | *                | *                | *                |                                     |
| Pelvic exam                                                             | * <sup>2</sup><br>X | *     | *    | *    | *     | *     | *     | *               | *               | *               | *                | *                | *                | *                                   |
| Record adverse events/social harms                                      |                     | *     | *    | *    | *     | *     | *     | *               | *               | *               | *                | *                | *                | *                                   |
| <b>LABORATORY ASSESSMENTS</b>                                           |                     |       |      |      |       |       |       |                 |                 |                 |                  |                  |                  |                                     |
| <b>Urine</b>                                                            |                     |       |      |      |       |       |       |                 |                 |                 |                  |                  |                  |                                     |
| Urine pregnancy test                                                    | X                   | X     | X    | X    | X     | X     | X     | X               | X <sup>2</sup>  | X <sup>2</sup>  | X <sup>2</sup>   | X <sup>2</sup>   | X <sup>2</sup>   | X <sup>2</sup>                      |
| GeneXpert (urine) for chlamydia and gonorrhea (NAAT)                    | X                   | *     | *    | *    | *     | *     | *     | *               | *               | *               | *                | *                | *                | *                                   |
| Urinalysis                                                              | *                   | *     | *    | *    | *     | *     | *     | *               | *               | *               | *                | *                | *                | *                                   |
| <b>Blood</b>                                                            |                     |       |      |      |       |       |       |                 |                 |                 |                  |                  |                  |                                     |
| Rapid HIV-1 blood tests                                                 | X                   | X     | X    | X    | X     | X     | X     | X               | X <sup>2</sup>  | X <sup>2</sup>  | X <sup>2</sup>   | X <sup>2</sup>   | X <sup>2</sup>   | X <sup>2</sup>                      |
| HIV confirmation blood test                                             | *                   | *     | *    | *    | *     | *     | *     | *               | *               | *               | *                | *                | *                | *                                   |
| Syphilis serology                                                       | X                   | *     | *    | *    | *     | *     | *     | *               | *               | *               | *                | *                | *                | *                                   |
| Hepatitis B antigen test                                                | X                   |       |      |      |       |       |       |                 |                 |                 |                  |                  |                  |                                     |
| Hepatitis C test                                                        | X <sup>3</sup>      |       |      |      |       |       |       |                 |                 |                 |                  |                  |                  |                                     |
| Creatinine blood test                                                   | X                   | *     | X    | *    | *     | X     | *     | X <sup>1</sup>  | X <sup>2</sup>  | *               | *                | *                | *                | X <sup>2</sup>                      |

| PROCEDURES                                | VISIT Day/Week |       |      |      |       |       |       |                 |                 |                 |                  |                  |                  |                                     |
|-------------------------------------------|----------------|-------|------|------|-------|-------|-------|-----------------|-----------------|-----------------|------------------|------------------|------------------|-------------------------------------|
|                                           | V0             | V1    | V2   | V3   | V4    | V5    | V6    | V7 <sup>3</sup> | V8 <sup>2</sup> | V9 <sup>2</sup> | V10 <sup>2</sup> | V11 <sup>2</sup> | V12 <sup>2</sup> | V13 <sup>1</sup> /Early Termination |
|                                           | Day ≤-45       | Day 1 | Wk 4 | Wk 8 | Wk 12 | Wk 16 | Wk 20 | Wk 24           | Wk 28           | Wk 32           | Wk 36            | Wk 40            | Wk 44            | Wk 48                               |
| Collect blood for DBS to assess adherence |                |       | X    | X    | X     | X     | X     | X               | X <sup>2</sup>  | X <sup>2</sup>  | X <sup>2</sup>   | X <sup>2</sup>   | X <sup>2</sup>   | X <sup>2</sup>                      |
| Blood draw for Complete Blood Count       | X <sup>1</sup> | *     | *    | *    | *     | *     | *     | X <sup>1</sup>  |                 |                 |                  |                  |                  |                                     |
| <b>Pelvic</b>                             |                |       |      |      |       |       |       |                 |                 |                 |                  |                  |                  |                                     |
| Rapid trichomonas (TV)                    | X <sup>3</sup> |       |      |      |       |       |       |                 |                 |                 |                  |                  |                  |                                     |
| Wet mount (TV, BV, candida)               | *              | *     | *    | *    | *     | *     | *     | *               | *               | *               | *                | *                | *                | *                                   |
| <b>Study product</b>                      |                |       |      |      |       |       |       |                 |                 |                 |                  |                  |                  |                                     |
| DOD first dose of regimen                 |                | X     |      |      | X     |       |       |                 |                 |                 |                  |                  |                  |                                     |
| Distribute product supply                 |                | X     | X    | X    | X     | X     | X     | X <sup>2</sup>  | X <sup>2</sup>  | X <sup>2</sup>  | X <sup>2</sup>   | X <sup>2</sup>   | X <sup>2</sup>   |                                     |
| Collect used and unused product supplies  |                |       | X    | X    | X     | X     | X     | X <sup>2</sup>  | X <sup>2</sup>  | X <sup>2</sup>  | X <sup>2</sup>   | X <sup>2</sup>   | X <sup>2</sup>   | X <sup>2</sup>                      |
| <b>Behavioral</b>                         |                |       |      |      |       |       |       |                 |                 |                 |                  |                  |                  |                                     |
| CASI baseline questionnaire               |                | X     |      |      |       |       |       |                 |                 |                 |                  |                  |                  |                                     |
| CASI monthly questionnaire                |                |       | X    | X    | X     | X     | X     | X <sup>2</sup>  | X <sup>2</sup>  | X <sup>2</sup>  | X <sup>2</sup>   | X <sup>2</sup>   | X <sup>2</sup>   | X <sup>2</sup>                      |
| In-depth exit interview                   |                |       |      |      |       |       |       | X <sup>1</sup>  |                 |                 |                  |                  |                  | (X) <sup>2</sup>                    |

<sup>1</sup>Zimbabwe only; <sup>2</sup>South Africa only; <sup>3</sup>Visit 7 is the Closing Visit in Zimbabwe

V = Visit; Wk = week; SCR = Screening; ENR = Enrolment; FU = follow up; CO = crossover; CH = Choice; CLO =

Closing Visit; \*If indicated; (X) sub-set of participants

♦Weight only at specified visits (when creatinine/creatinine clearance assessed); \$Height only at Screening
